# Supplementary material
Source: PubMed Central journal article supplement (PMC7195216)
Supplement: NIHMS1582419-supplement-Figure_S1-7.pdf [file NIHMS1582419-supplement-Figure_S1-7.pdf]

# **Type II Epithelial-mesenchymal transition upregulates protein N-glycosylation to maintain proteostasis and extracellular matrix production**

Jing Zhang<sup>1</sup>, Mohammad Jamaluddin<sup>1,2</sup>, Yueqing Zhang<sup>1</sup>, Steven G. Widen<sup>3</sup>, Hong Sun<sup>1</sup>, Allan R Brasier<sup>4\*</sup> and Yingxin Zhao<sup>1,2,3\*</sup>

<sup>1</sup>Department of Internal Medicine, University of Texas Medical Branch (UTMB), Galveston, TX, 77555-1060;

<sup>2</sup>Institute for Translational Sciences, UTMB;

<sup>3</sup>Sealy Center for Molecular Medicine, UTMB

<sup>4</sup>Institute for Clinical and Translational Research, University of Wisconsin-Madison School of Medicine and Public Health, Madison, WI 53705

\* Co-corresponding authors

Yingxin Zhao, Ph.D.

Tel 409-772-1923

Email: [yizhao@utmb.edu](mailto:yizhao@utmb.edu)

Allan R. Brasier, M.D.

Tel (608) 265-5996

Email: [abrasier@wisc.edu](mailto:abrasier@wisc.edu)

| <b>Supporting component</b>   | <b>Caption</b>                                                                                                 |
|-------------------------------|----------------------------------------------------------------------------------------------------------------|
| <b>Supplemental Table S1</b>  | The primers for RT-PCR                                                                                         |
| <b>Supplemental table S2</b>  | The parameters for LC-SRM-MS analysis.                                                                         |
| <b>Supplemental table S3</b>  | The parameters for LC-MS/MS label-free quantification and MaxQuant analysis.                                   |
| <b>Supplemental table S4</b>  | 2D annotation enrichment analysis of transcriptome and proteome data                                           |
| <b>Supplemental table S5</b>  | N-glycosylated peptides identified and quantified in hSAECs and EMT-hSAECs                                     |
| <b>Supplemental table S6</b>  | The proteins identified from the secretome of hSAECs and EMT-hSAECs in the presence or absence of tunicamycin. |
| <b>Supplemental table S7</b>  | The proteins identified from the secretome of hSAECs and EMT-hSAECs in the presence or absence of STF-083010.  |
| <b>Supplemental Figure S1</b> | Immunostaining of markers of epithelial cells and mesenchymal cells                                            |
| <b>Supplemental Figure S2</b> | TGF $\beta$ induced EMT alters protein N-glycosylation.                                                        |
| <b>Supplemental Figure S3</b> | Label-free quantification of the secretome of hSAECs and EMT-hSAECs in the presence or absence of tunicamycin. |
| <b>Supplemental Figure S4</b> | The effect of GlcNAc supplement on the EMT process and secretion of ECM.                                       |
| <b>Supplemental figure S5</b> | Label-free quantification of the secretome of hSAECs and EMT-hSAECs in the presence or absence of STF-083010.  |
| <b>Supplemental Figure S6</b> | Activation of UPR-XBP1 and HBP during the course of EMT.                                                       |
| <b>Supplemental Figure S7</b> | The effect of XBP1 splicing inhibitor on the EMT process.                                                      |
| <b>Supplemental Figure S8</b> | The effect of Brefeldin A (BFA) on the secretion of ECMs and the turnover of fibronectin                       |

Supplemental Figure S1

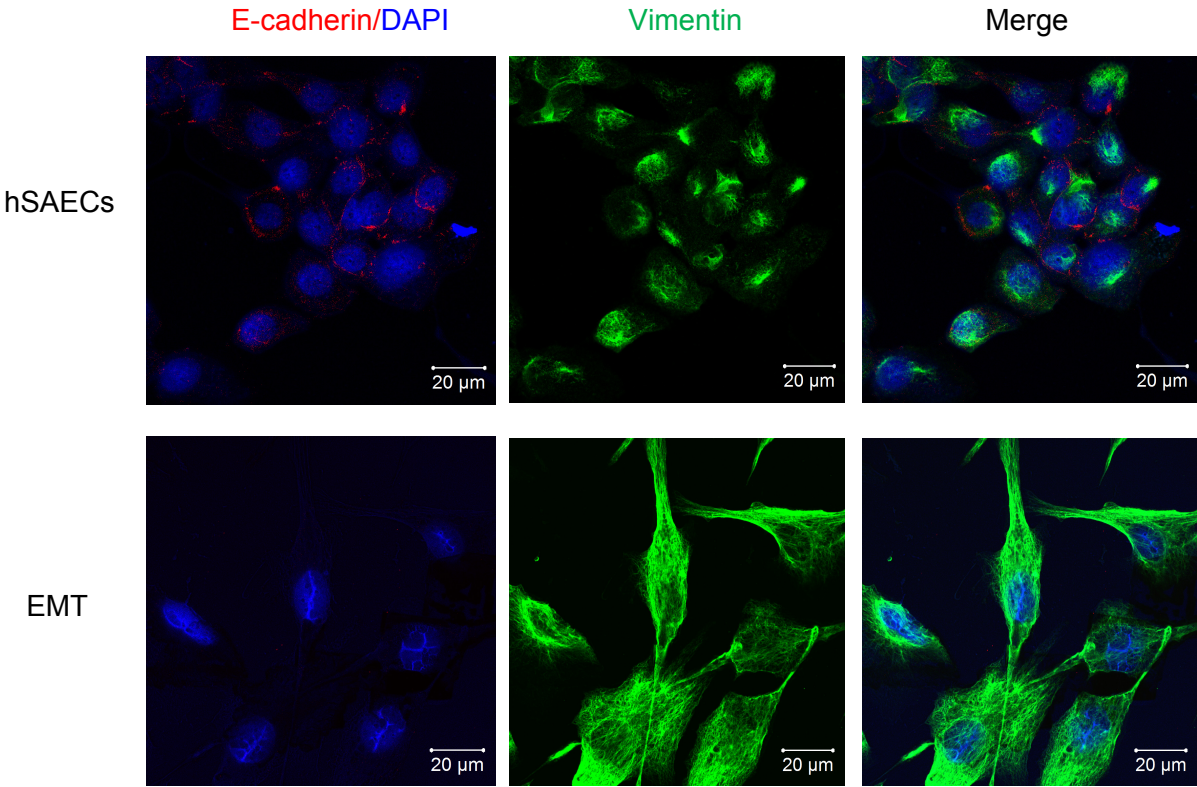

**Supplemental Figure S1. Immunostaining of markers of epithelial cells and mesenchymal cells.** The fixed hSAECs (upper panel) and EMT-hSAECs (lower panel) were stained with DAPI for nuclei (blue), E-cadherin (red) and vimentin (green) (magnify x63).

## Supplemental Figure S2.

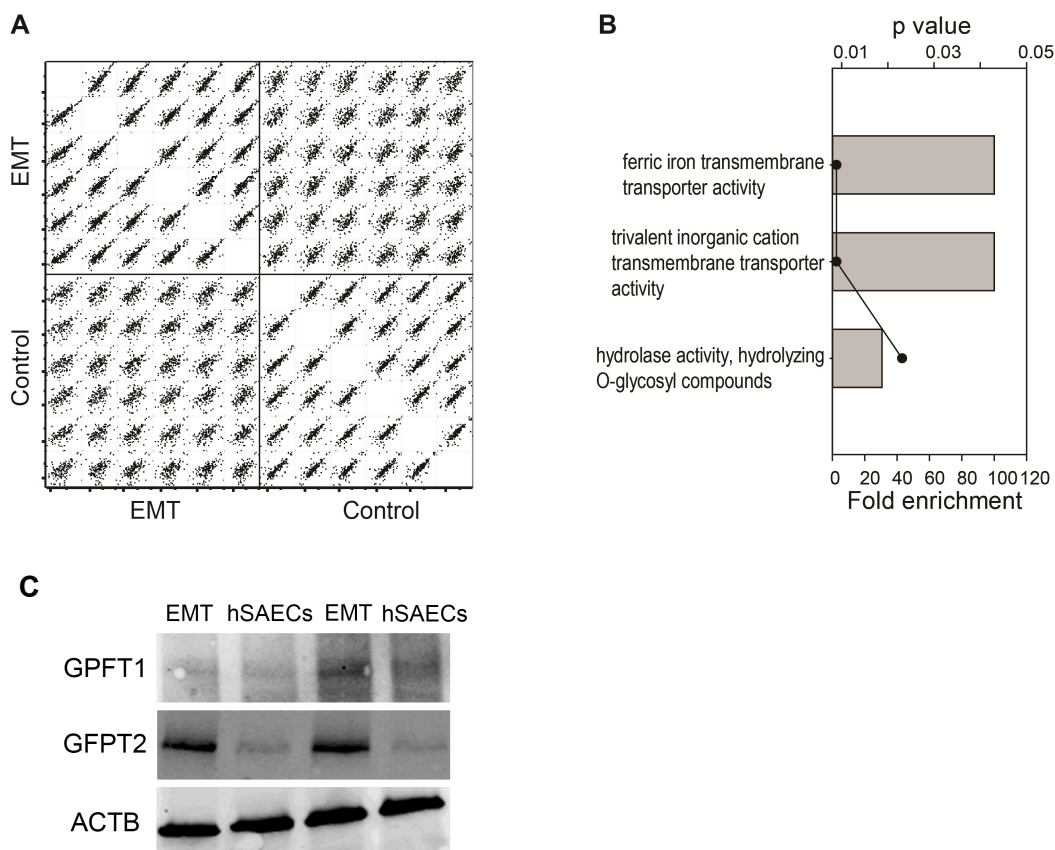

**Supplemental Figure S2. TGF $\beta$  induced EMT alters protein N-glycosylation.** The hSAECs were treated with TGF $\beta$  for 14 days. **(A)** Multiple scatter plots of the MS intensity of N-glycosylated peptides identified from EMT-hSAECs and control SAECs (six replicates for each sample). **(B)** GO molecular function enrichment analysis for the proteins which N-glycosylation levels were down-regulated by EMT (P value < 0.05 with Bonferroni correction for multiple testing). Each annotation is displayed by fold enrichment (bar) and p-value (scatter plot). **(C)** Western blot of GFPT1 and GFPT2 in the cell lysate of hSAECs and EMT-hSAECs.

**Supplemental Figure S3**

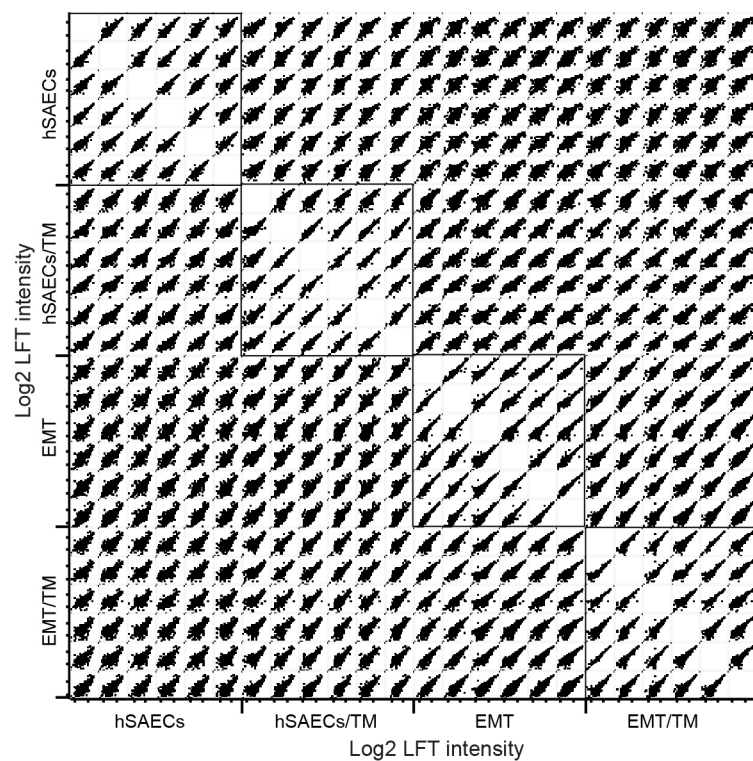

**Supplemental Figure S3. Label-free quantification of the secretome of hSAECs and EMT-hSAECs in the presence or absence of tunicamycin. Multiple scatter plots of the LFQ intensity of the proteins quantified in each biological and technical replicates.**

**Supplemental Figure S4**

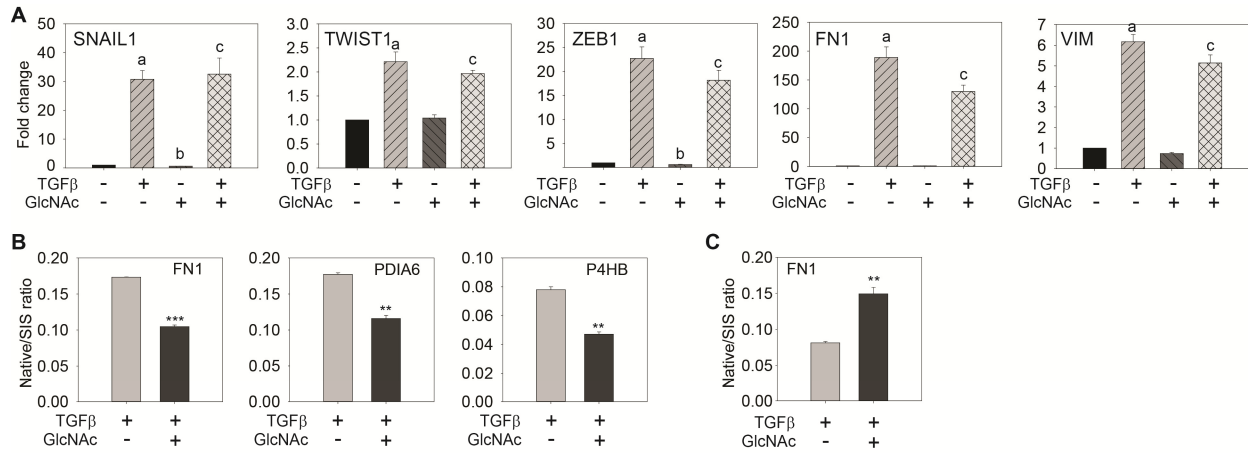

**Supplemental Figure S4. The effect of GlcNAc supplement on the EMT process and secretion of ECM. (A)** RT-PCR analysis of gene expression of EMT transcription regulators (SNAIL1, TWIST1, and ZEB1) and EMT markers (FN1 and VIM). P-value <0.05 in the following comparison: a, EMT vs hSAECs; b, hSAECs/GlcNAc vs. hSAECs; and c, EMT/GlcNAc vs. EMT. **(B)** The protein expression of FN1, PDIA6, and P4HB in the cell lysate of EMT-hSAECs ± GlcNAc. **(C)** The abundance of FN1 in the cell culture medium of EMT-hSAECs ± GlcNAc. Error bar, standard error. \*\*, p-value of t test is below 0.05; \*\*\*, p-value of t test is below 0.001.

## Supplemental Figure S5

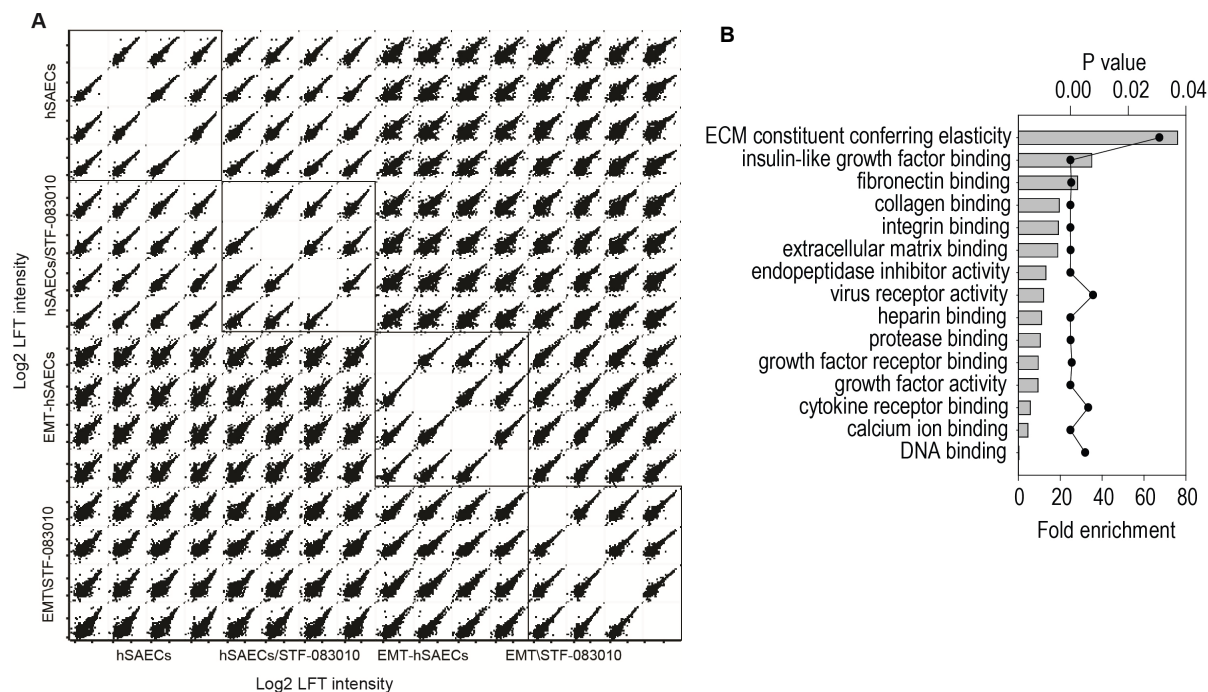

**Supplemental Figure S5. Label-free quantification of the secretome of hSAECs and EMT-hSAECs in the presence or absence of STF-083010.** (A) Multiple scatter plots of the LFQ intensity of the proteins quantified in each biological and technical replicates. (B) GO molecular function enrichment analysis of proteins which secretion was up-regulated by EMT, but down-regulated by STF-083010 (Cluster 3 in the Figure 5D).

**Supplemental Figure S6**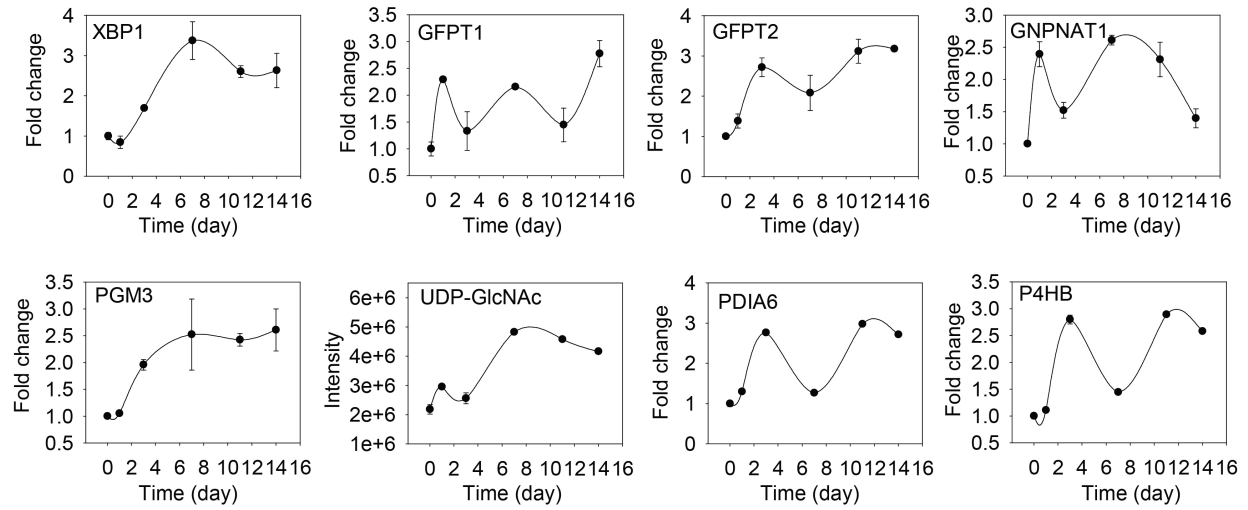

**Supplemental Figure S6. Activation of UPR-XBP1 and HBP during the course of EMT.** hSAECs were treated with TGF $\beta$  for 0, 1, 3, 7, 11, and 14 d. The protein expression of GFPT1, GFPT2, GNPAT1, PGM3, PDIA6, P4HB, and XBP1 were measured by SID-SRM-MS. The intracellular level of UDP-GlcNAc during this time course was measured by SRM-MS. Error bar, standard error.



**Supplemental Figure S7**

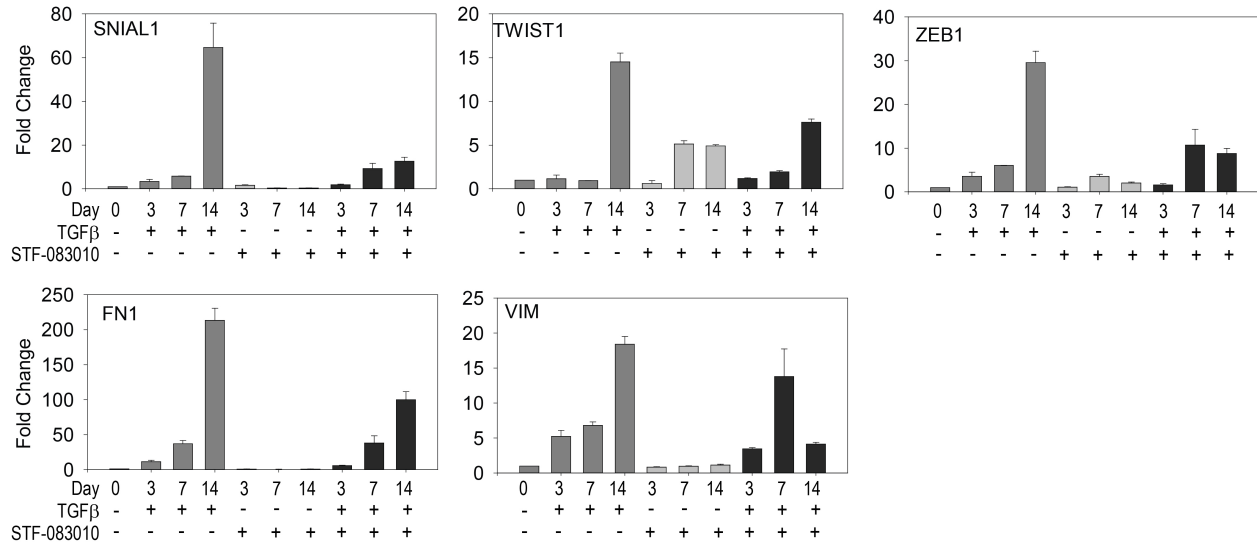

**Supplemental Figure S7. The effect of XBP1 splicing inhibitor on the EMT process.** RT-PCR analysis of EMT transcription regulators (SNAIL1, TWIST1, and ZEB1) and EMT markers (FN1 and VIM).

**Supplemental Figure S8**

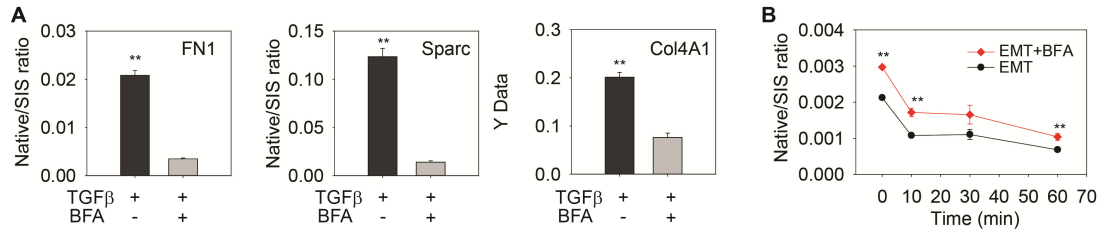

**Supplemental Figure S8. The effect of Brefeldin A (BFA) on the secretion of ECMs and the turnover of fibronectin. (A)** The abundance of ECMs (FN1, Sparc, and Col4A) in the cell culture medium of EMT-hSAECs ± BFA. **(B)** The turnover of FN1 in EMT-hSAECs treated with cycloheximide in the presence or absence of BFA. Error bar, standard error. \*\*, p-value of t test is below 0.05; \*\*\*, p-value of t test is below 0.001.
